# Supplementary material for: USP14 Regulates Cancer Cell Growth in a Fatty Acid Synthase-Independent Manner
Source: MDPI journal article supplement (doi:10.3390/ijms222413437), 2021-12-14
Supplement: s1 [file s1]

# USP14 regulates cancer cell growth in a fatty acid synthase-independent manner.

Ji Su Yang <sup>1,2</sup>, Naeun Yoon <sup>1,3</sup>, Mingyu Kong <sup>1,4</sup>, Byung Hwa Jung <sup>1,5</sup>, Hyunbeom Lee <sup>1,6,\*</sup> and Jinyoung Park <sup>1,\*</sup>

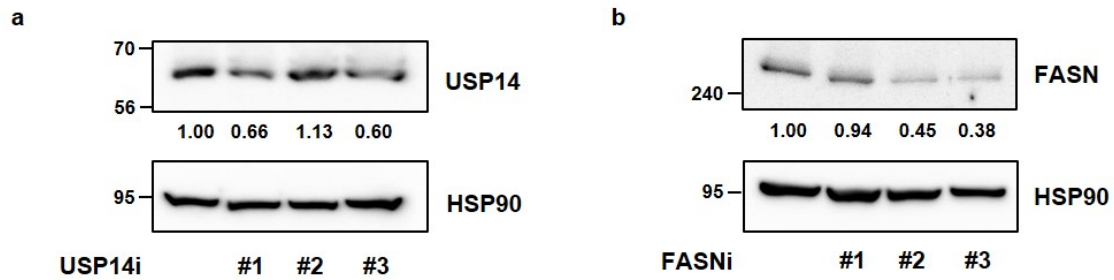

**Figure S1.** Efficiency of siRNAs targeting USP14 or FASN. LNCaP cells were transfected with (a) siRNAs targeting *USP14* (USP14i-#1, #2, #3) or (b) *FASN* (FASNi-#1, #2, #3) for 48 h. Cell lysates were immunoblotted with the indicated antibodies. HSP90 was used as a loading control. The band intensity of USP14 or FASN was measured by Image J and then normalized by each HSP90 protein.

**a**

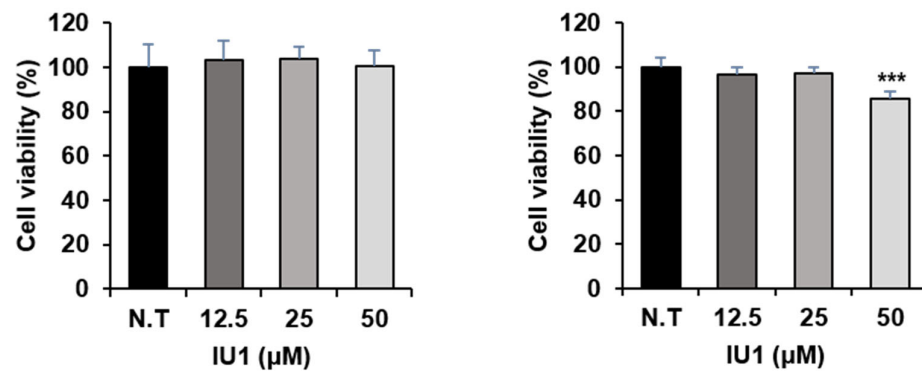

**b**

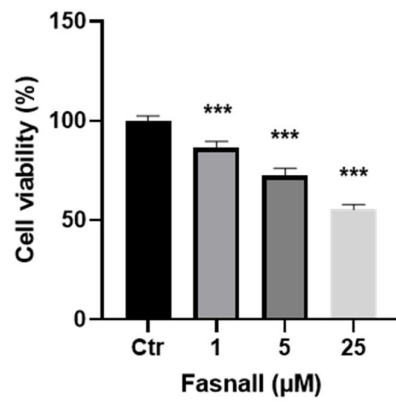

**Figure S2.** IU1 or Fasnall reduces cancer cell proliferation. (a, b) Cell viability was measured by the WST-1 assay. LNCaP cells were treated with (a) IU1 for 24 h (left) or 48 h (right), or (b) Fasnall for 24 h.

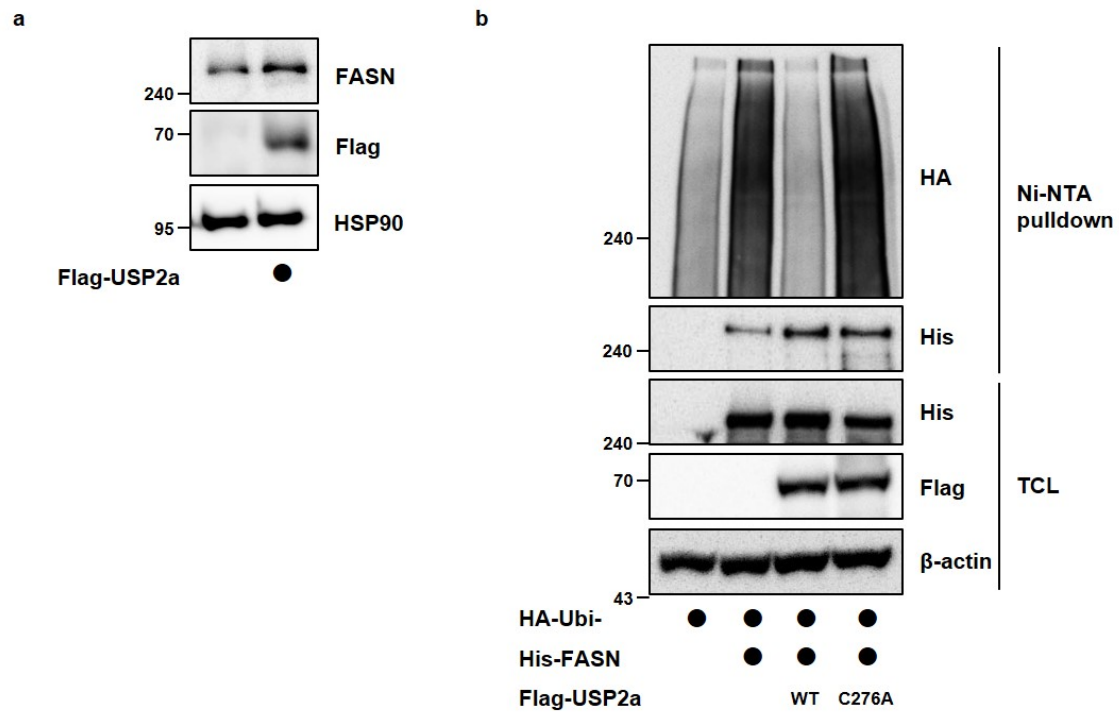

**Figure S3.** USP2a increases FASN protein levels by inhibiting FASN ubiquitination in LNCaP cells. (a) LNCaP cells were transfected with Flag-USP2a. (b) LNCaP cells were transfected with HA-ubiquitin alone or in combination with His-FASN, Flag-USP2a WT or Flag-USP2a C276A. 10  $\mu$ M MG132 treated for 6 h in cells before the harvest. FASN ubiquitination was observed using a Ni-NTA-mediated pull down assay. Cell lysates were immunoblotted with the indicated antibodies.
